# Supplementary material
Source: publisher figshare collection journal article supplement (https://tandf.figshare.com/ndownloader/files/16405292)
Supplement: Supplementary file 1 [file 16405292]

**Table S1.** For each study plot (LE 1 - 11) the mean percentage of every habitat category and area related to urbanisation across the 7 surveys is shown, including the overall mean across the different study plots.

|  | LE_1 | LE_2 | LE_3 | LE_4 | LE_5 | LE_6 | LE_7 | LE_8 | LE_9 | LE_10 | LE_11 | Mean |
| --- | --- | --- | --- | --- | --- | --- | --- | --- | --- | --- | --- | --- |
| Cereals | 33.26 | 43.32 | 26.47 | 38.12 | 29 | 36.34 | 58.96 | 39.25 | 39.74 | 39 | 31.49 | 37.72 |
| Urbanised area | 6.62 | 2.64 | 11.06 | 1.99 | 7.69 | 9.87 | 7.01 | 14.59 | 12.17 | 13.09 | 8.18 | 8.63 |
| Cultivated 3 | 9.14 | 3.03 | 4.58 | 24.37 | 4.84 | 12.79 | 4.69 | 0.36 | 0.31 | 0.6 | 10.04 | 6.80 |
| Woody area | 20.07 | 3.45 | 11.64 | 0.15 | 0.27 | 5.72 | 9.88 | 4.18 | 2.14 | 2.27 | 10.18 | 6.36 |
| Cultivated 2 | 0.15 | 0.28 | 4.68 | 2.63 | 5.55 | 3.39 | 3.86 | 2.98 | 6.1 | 16.9 | 9.95 | 5.13 |
| Legum | 2.04 | 5.76 | 4.32 | 1.33 | 0 | 10.48 | 4.75 | 1 | 7.82 | 5.85 | 9.7 | 4.82 |
| Cultivated 1 | 0 | 1.19 | 0.15 | 2.37 | 2.11 | 0 | 0 | 19.02 | 13.57 | 6.82 | 0 | 4.11 |
| Maize | 0.73 | 4.93 | 7.64 | 2.89 | 6.39 | 5.83 | 0 | 1.33 | 2.83 | 0 | 4.97 | 3.41 |
| Grass | 0.79 | 11.87 | 2.23 | 0.43 | 1.36 | 2.2 | 1.62 | 4.45 | 3.47 | 6.19 | 5.3 | 3.63 |
| Oilseed rape | 16.33 | 4.89 | 1.91 | 0 | 0 | 0.73 | 0 | 0.16 | 0 | 0 | 0 | 2.18 |

**Table S2.** Mean percentage of every habitat category within all buffer circles (100 m) around presence and absence points of Skylarks.

|  | Presence points | Absence points |
| --- | --- | --- |
| Cereals | 58.78 | 30.68 |
| Urbanised area | 1.98 | 8.74 |
| Cultivated 3 | 3.87 | 7.63 |
| Woody area | 1.31 | 8.36 |
| Cultivated 2 | 2.23 | 7.61 |
| Legum | 6.02 | 4.31 |
| Cultivated 1 | 1.35 | 6.83 |
| Maize | 4.10 | 3.81 |
| Grass | 2.40 | 4.27 |
| Oilseed rape | 2.33 | 1.86 |
